# Supplementary material
Source: HighWire-hosted journal article supplement (https://www.jrheum.org/highwire/filestream/40434/field_highwire_adjunct_files/0/201376DataSuppl.pdf)
Supplement: 201376DataSuppl.pdf [file 201376DataSuppl.pdf]

## ONLINE SUPPLEMENTARY MATERIAL

**Supplementary Table 1.** Radiographic assessments during the study

| Time point | Campaign 1         | Campaign 2           | Campaign 3           |
|------------|--------------------|----------------------|----------------------|
|            | Double-blind phase | Open-label extension | Open-label extension |
| Baseline   | X                  | X                    | X                    |
| 6 months   | X                  | X                    |                      |
| 12 months  | X                  | X                    | X                    |
| 18 months  |                    | X                    |                      |
| 24 months  |                    |                      | X                    |
| 36 months  |                    |                      | X                    |

X indicates that the images were assessed or reassessed.

**Supplementary Table 2.** Changes in mTSS after 12 months during campaigns 1 (double-blind period) and 3 (current open-label extension).

| Treatment group | Changes in mTSS after 12 months |                   |            |                   |
|-----------------|---------------------------------|-------------------|------------|-------------------|
|                 | Campaign 1 <sup>a</sup>         |                   | Campaign 3 |                   |
|                 | n                               | Change (95% CI)   | n          | Change (95% CI)   |
| Placebo         | 218                             | 1.49 (0.99, 1.99) | -          | -                 |
| Placebo/Q6M     | -                               | -                 | 105        | 1.29 (0.74, 1.84) |
| Placebo/Q3M     | -                               | -                 | 101        | 1.60 (0.88, 2.31) |
| Q6M             | 217                             | 0.99 (0.49, 1.49) | 191        | 1.25 (0.66, 1.84) |
| Q3M             | 219                             | 0.72 (0.41, 1.03) | 193        | 0.98 (0.55, 1.41) |

<sup>a</sup>Takeuchi et al., Ann Rheum Dis 2019;78:899-907

CI confidence interval; mTSS modified total Sharp score; Q3M, denosumab 60 mg every 3 months; Q6M, denosumab 60 mg every 6 months.

Supplementary Figure 1. Study design

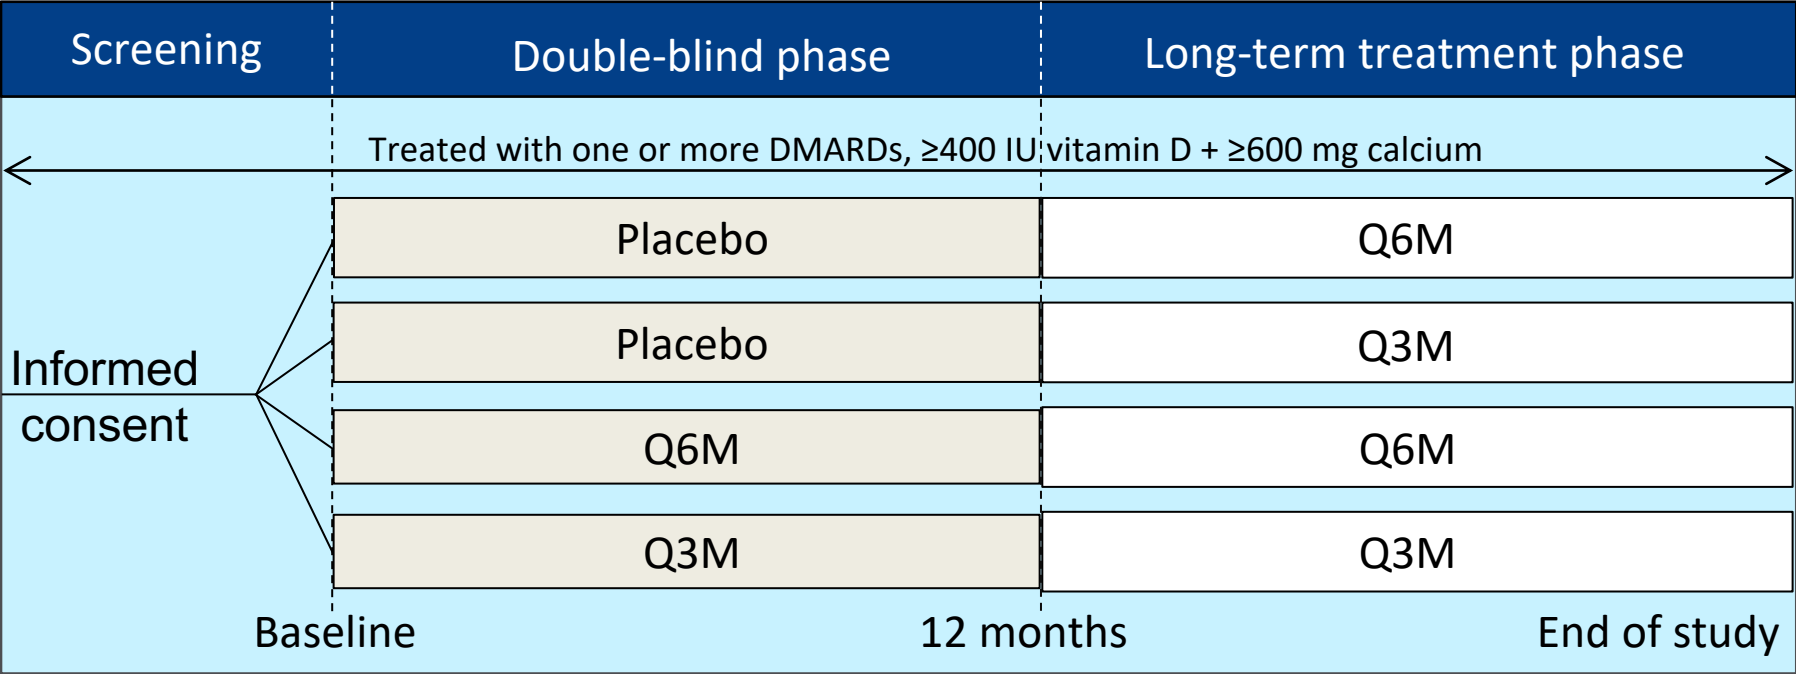

DMARDs, disease-modifying anti-rheumatic drugs; Q3M, denosumab 60 mg every 3 months; Q6M, denosumab 60 mg every 6 months.

Supplementary Figure 2. Mean change in DAS28-CRP from baseline

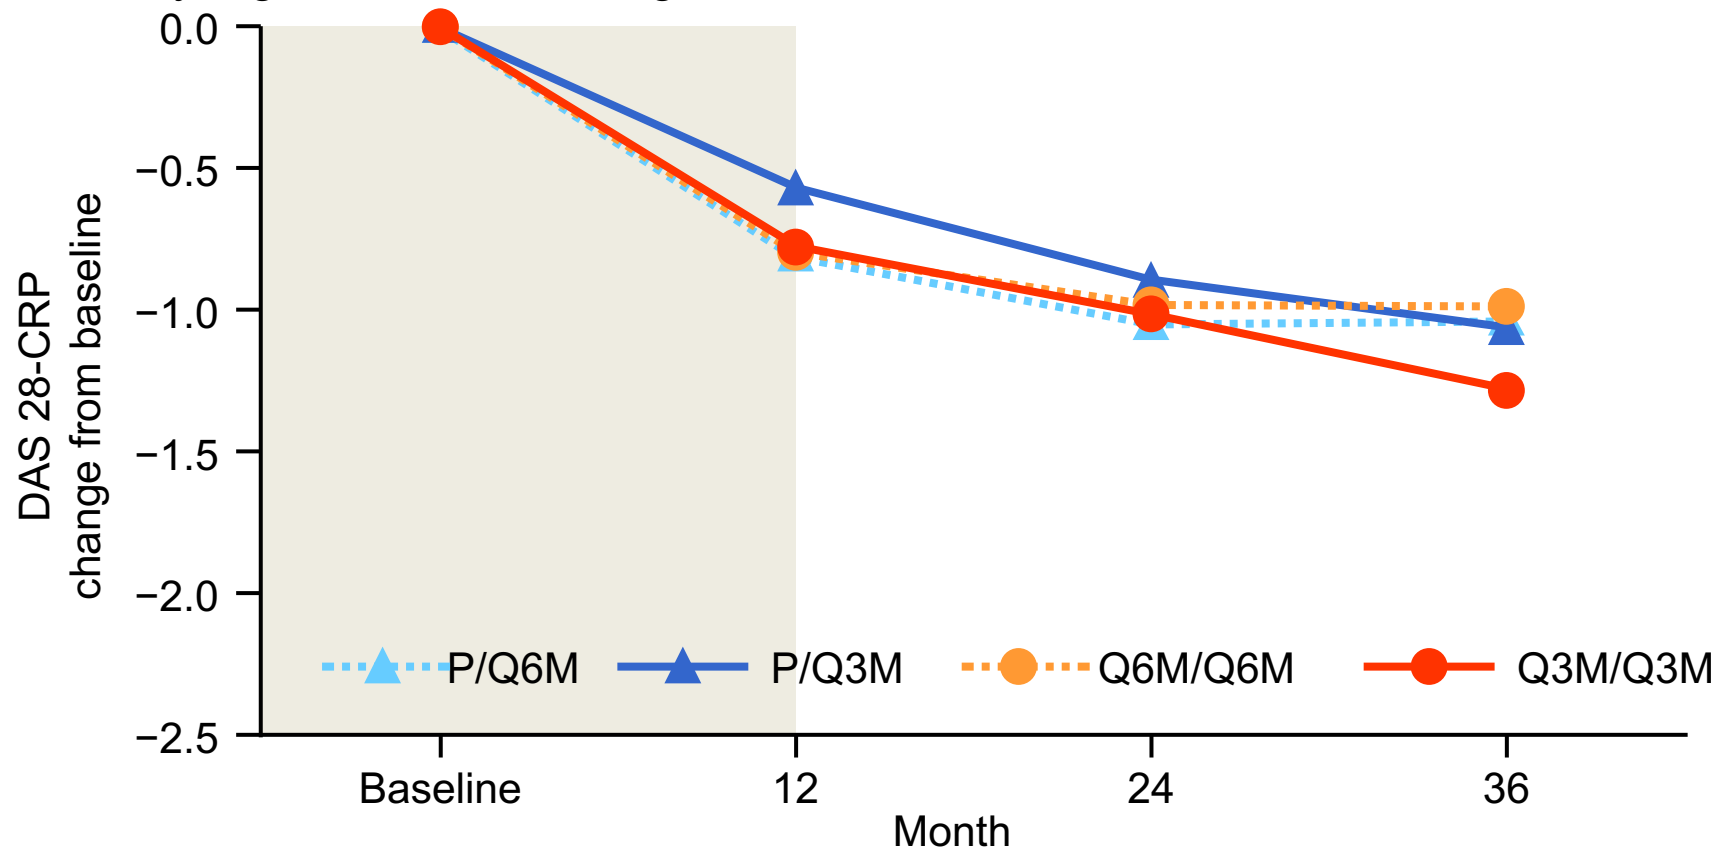

|             |     |     |    |
|-------------|-----|-----|----|
| P/Q6M (n)   | 105 | 100 | 52 |
| P/Q3M (n)   | 101 | 93  | 52 |
| Q6M/Q6M (n) | 190 | 172 | 95 |
| Q3M/Q3M (n) | 192 | 173 | 96 |

DAS28-CRP, Disease Activity Score using 28 joints and C-reactive protein; P/Q3M, placebo for 12 months followed by denosumab 60 mg every 3 months; P/Q6M, placebo for 12 months followed by denosumab 60 mg every 6 months; Q3M/Q3M, denosumab 60 mg every 3 months for 12 months followed by denosumab 60 mg every 3 months; Q6M/Q6M, denosumab 60 mg every 6 months for 12 months followed by denosumab 60 mg every 6 months.

Supplementary Figure 3. Mean change in HAQ-DI from baseline

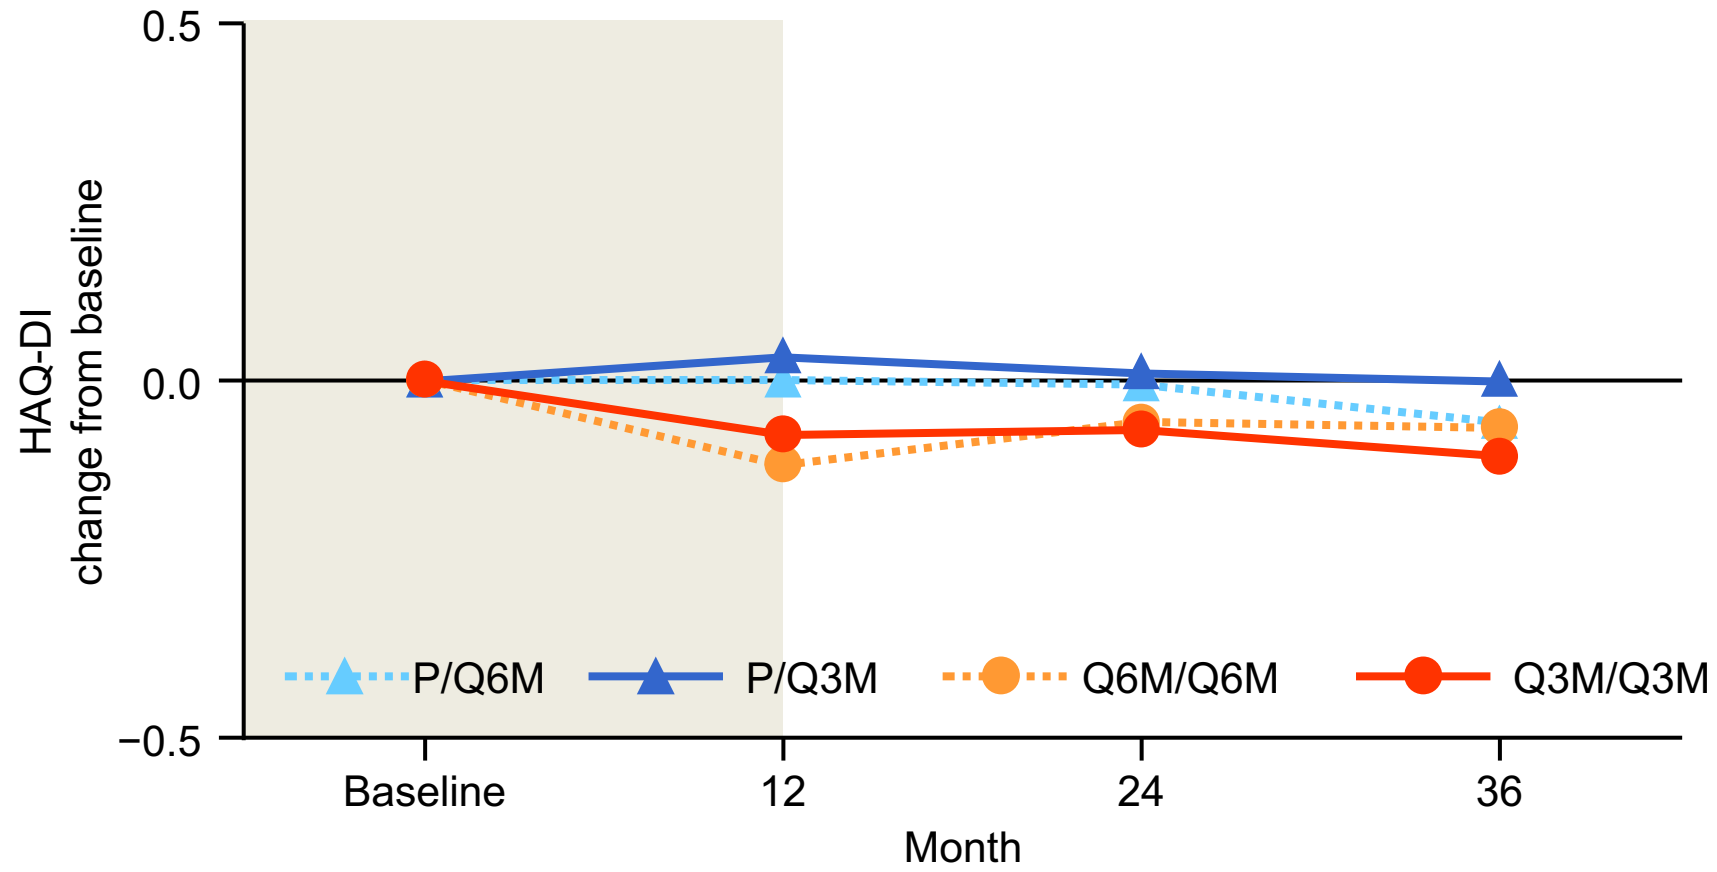

|             |     |     |    |
|-------------|-----|-----|----|
| P/Q6M (n)   | 105 | 100 | 52 |
| P/Q3M (n)   | 101 | 93  | 52 |
| Q6M/Q6M (n) | 190 | 172 | 95 |
| Q3M/Q3M (n) | 192 | 173 | 96 |

HAQ-DI, Health Assessment Questionnaire Disability Index; P/Q3M, placebo for 12 months followed by denosumab 60 mg every 3 months; P/Q6M, placebo for 12 months followed by denosumab 60 mg every 6 months; Q3M/Q3M, denosumab 60 mg every 3 months for 12 months followed by denosumab 60 mg every 3 months; Q6M/Q6M, denosumab 60 mg every 6 months for 12 months followed by denosumab 60 mg every 6 months.

5

Supplementary Figure 4 (A). Percent change in urine C-telopeptide of type II collagen/creatinine from baseline to each visit

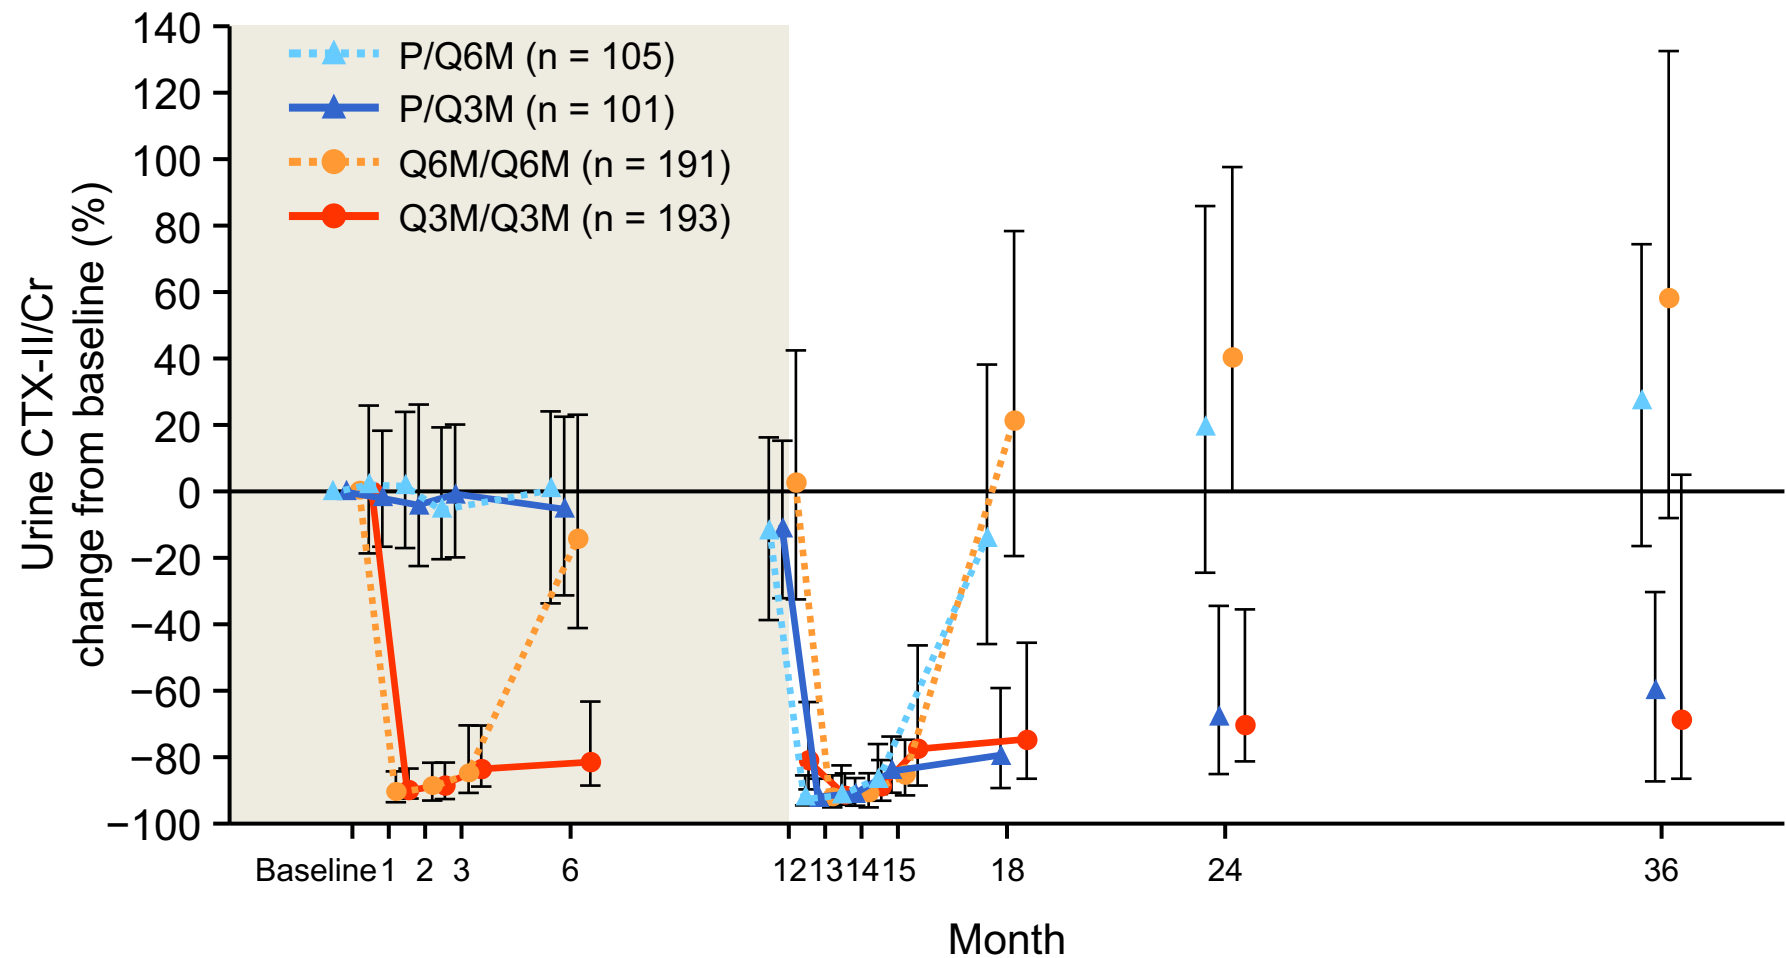

Median (interquartile range).  
CTX-II/Cr, C-telopeptide of type II collagen adjusted for creatinine; P/Q3M, placebo for 12 months followed by denosumab 60 mg every 3 months; P/Q6M, placebo for 12 months followed by denosumab 60 mg every 6 months; Q3M/Q3M, denosumab 60 mg every 3 months for 12 months followed by denosumab 60 mg every 3 months; Q6M/Q6M, denosumab 60 mg every 6 months for 12 months followed by denosumab 60 mg every 6 months.  
Long-term radiography analysis set.

Supplementary Figure 4 (B). Percent change in cartilage oligomeric matrix protein from baseline to each visit

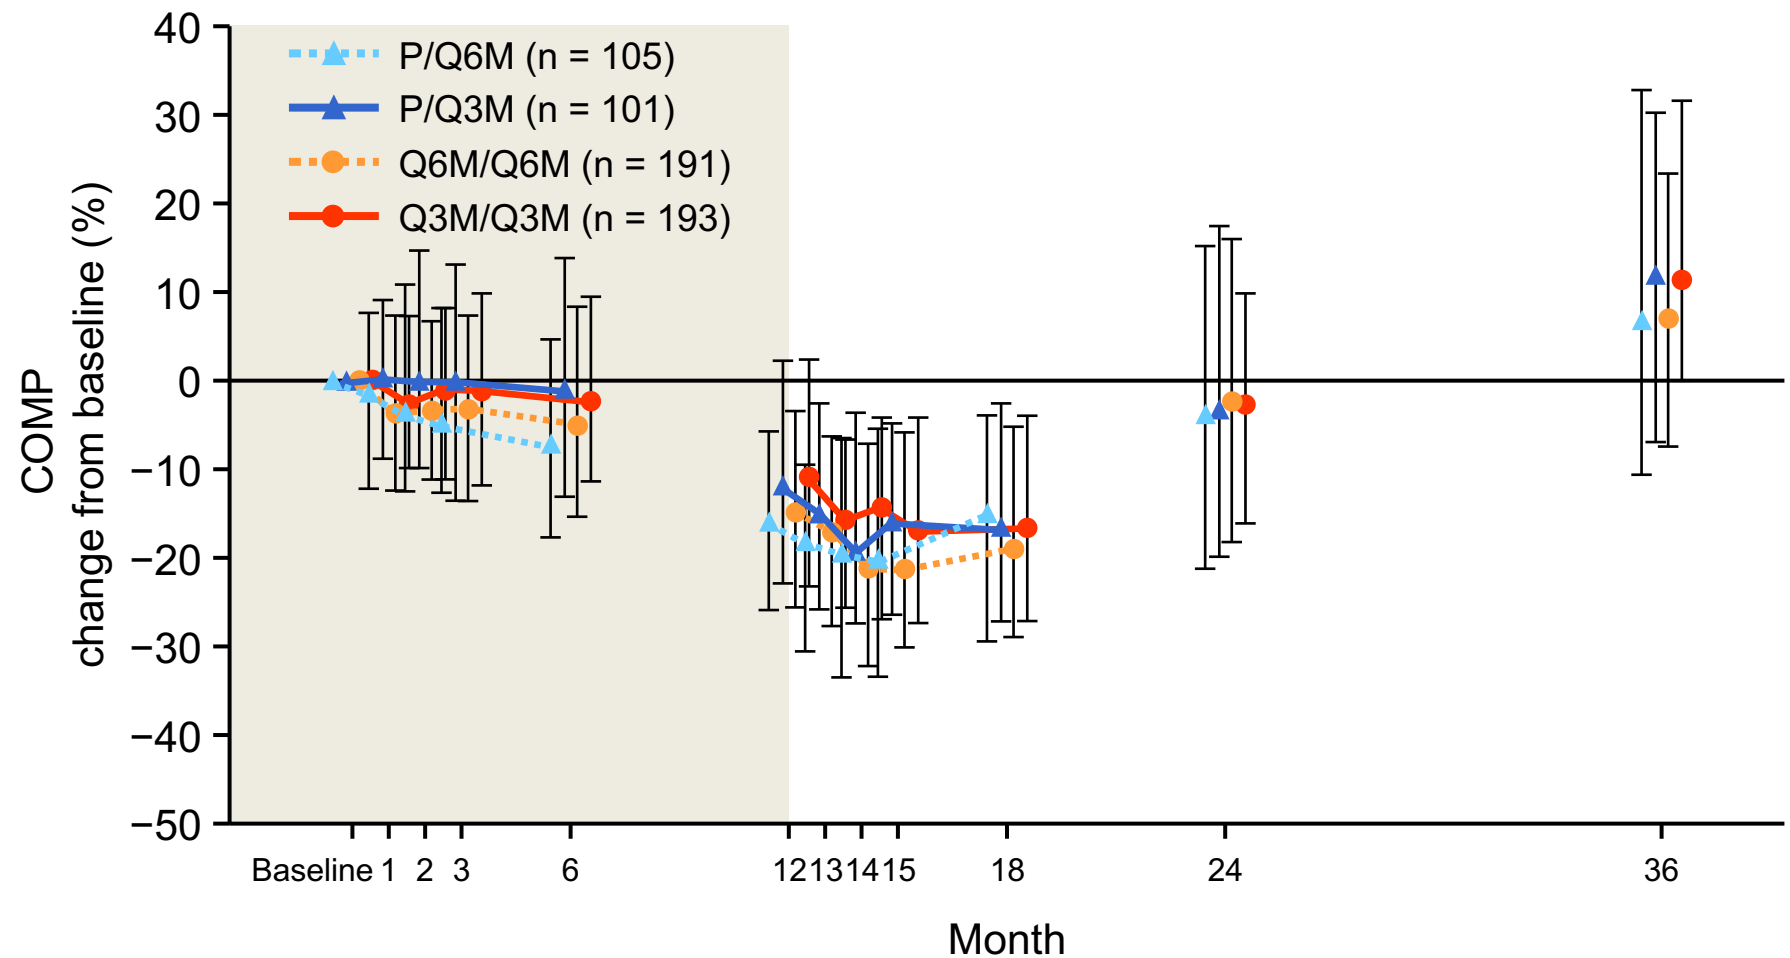

Median (interquartile range).  
COMP, cartilage oligomeric matrix protein; P/Q3M, placebo for 12 months followed by denosumab 60 mg every 3 months; P/Q6M, placebo for 12 months followed by denosumab 60 mg every 6 months; Q3M/Q3M, denosumab 60 mg every 3 months for 12 months followed by denosumab 60 mg every 3 months; Q6M/Q6M, denosumab 60 mg every 6 months for 12 months followed by denosumab 60 mg every 6 months.  
Long-term radiography analysis set.

7
